# Supplementary material
Source: PubMed Central journal article supplement (PMC7859877)
Supplement: jamasurg-e206942-s001.pdf [file jamasurg-e206942-s001.pdf]

## Supplemental Online Content

Wang T, Bredbeck BC, Sinco B, et al. Variations in persistent use of low-value breast cancer surgery. *JAMA Surg*. Published online February 3, 2021.  
doi:10.1001/jamasurg.2020.6942

**eAppendix 1.** Detailed description of study cohorts

**eAppendix 2.** Methods: Volume Categories

**eAppendix 3.** Comparison of facility type and breast cancer volume for hospitals ranking in the bottom versus top quintile for procedure performance

**eAppendix 4.** Trends in performance of low-value breast cancer operations based on facility type

**eAppendix 5.** Trends in performance of low-value breast cancer operations based on facility volume

This supplemental material has been provided by the authors to give readers additional information about their work.

## **Appendix A. Detailed description of study cohorts**

### **Axillary lymph node dissection (ALND) for lumpectomy patients with 1-2 positive nodes receiving radiotherapy**

For evaluation of ALND rates, the study cohort was designed to mirror inclusion criteria of the American College of Surgeons Oncology Group (ACOSOG) Z0011 trial which informed the recommendation to omit ALND for limited nodal disease. The sample was limited to women diagnosed with invasive breast cancer who received a lumpectomy and post-operative radiotherapy. Only patients with a tumor size  $\leq 5$  cm (pathologic stage T1-T2) and 1 or 2 positive lymph nodes were included. NCDB does not provide a variable to indicate whether a patient received SLNB or ALND. Following methods previously defined in the literature, patients were classified as receiving ALND if they had eight or more lymph nodes examined. By definition, all patients had at least one lymph node examined, and we assumed that patients who had one to seven lymph nodes examined received SLNB only. A total of 47,174 cases met the eligibility criteria for evaluation of ALND rates.

### **Lumpectomy re-operation for patients receiving radiotherapy**

For evaluation of lumpectomy margin re-operation rates, the study cohort was designed to mirror criteria based on the 2014 SSO/ASTRO consensus statement endorsing a margin of “no tumor on ink”. The sample was limited to women stage I or II invasive breast cancer tumors who received a lumpectomy as the initial operation and received post-lumpectomy adjuvant radiotherapy. Patients who were diagnosed with an excisional biopsy, who received their final operation more than 90 days after their initial operation, and who had positive margins at the final operation were excluded from analysis. NCDB provides information about the final operation that a patient receives; it does not provide information on the initial operation, reason or reoperation, or number of reoperations. Following previously described methods, re-operation was used as a proxy for lumpectomy margin re-excision. Patients who had a time to definitive operation that was greater than the time to first operation were defined as receiving a repeat operation. Patients who received a repeat operation and had either a unilateral or bilateral mastectomy at their final operation were assumed to have had a lumpectomy at their initial operation. A total of 487,443 cases met the eligibility criteria for evaluation of re-operation rates.

### **Contralateral prophylactic mastectomy (CPM) for patients with unilateral breast cancer**

For evaluation of CPM rates, the sample was limited to women with unilateral in situ or invasive stage 0-II breast cancer who received a mastectomy. NCDB does not provide information on high-risk characteristics (e.g. genetic mutations such as BRCA), but we assumed that the incidence of high-risk patients would be stable over time. Patients who received bilateral mastectomy for a unilateral cancer were classified as having received a contralateral prophylactic mastectomy. A total of 372,561 cases met the eligibility criteria for evaluation of CPM rates.

### **Sentinel lymph node biopsy (SLNB) for women $\geq 70$ years old with clinically node negative hormone receptor positive cancer**

For evaluation of rates of axillary lymph node evaluation in older patients, the study cohort was limited to women 70 years of age or older with clinically node negative, stage I-II, hormone receptor positive invasive breast cancer. Hormone receptor positivity was defined as tumors that were either estrogen receptor positive (ER+) and/or progesterone receptor positive (PR+). Patients who did not receive any surgical treatment for their primary tumor (either lumpectomy or mastectomy) within 12 months of diagnosis were excluded. Because NCDB does not have a variable to determine whether a patient received SLNB or ALND, all patients who had 1 or more regional lymph nodes examined were defined as receiving axillary evaluation with SLNB. A total of 212,733 cases met the eligibility criteria for evaluation of SLNB rates.

### Appendix B. Methods: Volume Categories

**eTable 1: Facilities in each volume category by procedure**

| Procedure    | Low Volume  | Medium Volume | High Volume | Total Facilities |
|--------------|-------------|---------------|-------------|------------------|
| ALND         | 54 (9.6%)   | 260 (46.3%)   | 248 (44.1%) | 562              |
| Re-Operation | 596 (48.0%) | 388 (31.3%)   | 257 (20.7%) | 1,241            |
| CPM          | 582 (47.4%) | 388 (31.6%)   | 257 (21.0%) | 1,227            |
| SLNB         | 492 (43.4%) | 386 (34.0%)   | 256 (22.6%) | 1,134            |

**eTable 2: Patients from facilities in each volume category by procedure**

| Procedure    | Low Volume     | Medium Volume   | High Volume     | Total Patients |
|--------------|----------------|-----------------|-----------------|----------------|
| ALND         | 809 (1.7%)     | 10,433 (22.1%)  | 35,932 (76.2%)  | 47,174         |
| Re-Operation | 84,896 (17.4%) | 159,703 (32.8%) | 242,844 (49.8%) | 487,443        |
| CPM          | 62,986 (16.9%) | 119,227 (32.0%) | 190,348 (51.1%) | 372,561        |
| SLNB         | 37,405 (17.6%) | 74,594 (35.1%)  | 100,734 (47.4%) | 212,733        |

**eFigure 1: Histogram of average annual facility volume (N = 1342 Facilities)**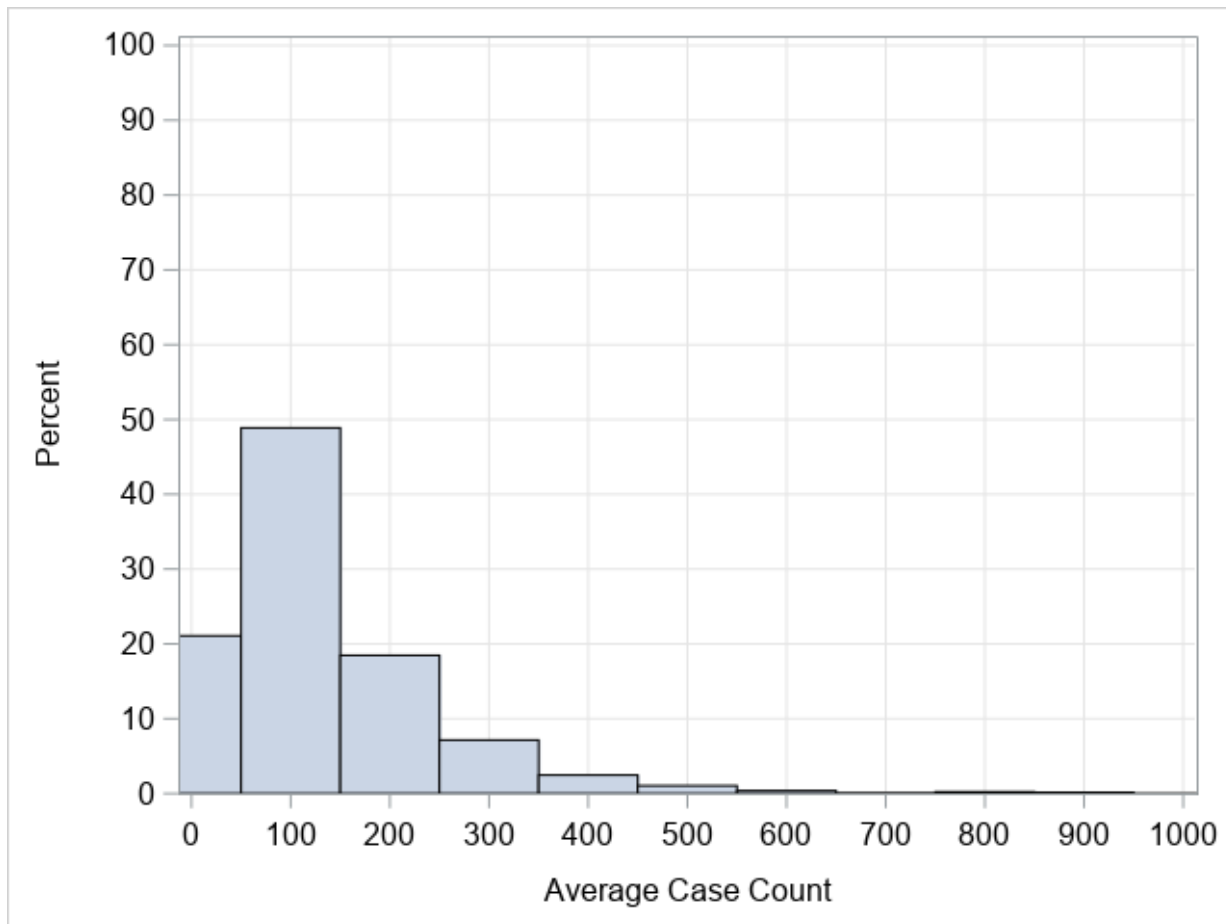

**Appendix C. Comparison of facility type and breast cancer volume for hospitals ranking in the bottom versus top quintile for procedure performance**

**Axillary lymph node dissection (ALND) for lumpectomy patients with 1-2 positive nodes receiving radiotherapy**

|                      | <b>Facility Category</b>               | <b>Bottom Quintile</b> | <b>Top Quintile</b> |
|----------------------|----------------------------------------|------------------------|---------------------|
| Breast Cancer Volume | Low Volume                             | 3 (3.7%)               | 1 (1.3%)            |
|                      | Medium Volume                          | 21 (25.6%)             | 24 (30.8%)          |
|                      | High Volume                            | 58 (70.7%)             | 53 (68.0%)          |
| Facility Type        | Community Cancer Program               | 3 (3.7%)               | 2 (2.6%)            |
|                      | Comprehensive Community Cancer Program | 38 (46.3%)             | 33 (42.3%)          |
|                      | Academic/Research Program              | 24 (29.3%)             | 31 (39.7%)          |
|                      | Integrated Network Cancer Program      | 17 (20.7%)             | 12 (15.4%)          |

**Lumpectomy re-operation for patients receiving radiotherapy**

|                      | <b>Facility Category</b>               | <b>Bottom Quintile</b> | <b>Top Quintile</b> |
|----------------------|----------------------------------------|------------------------|---------------------|
| Breast Cancer Volume | Low Volume                             | 43 (47.3%)             | 43 (53.1%)          |
|                      | Medium Volume                          | 28 (30.8%)             | 24 (29.6%)          |
|                      | High Volume                            | 20 (22.0%)             | 14 (17.3%)          |
| Facility Type        | Community Cancer Program               | 14 (15.4%)             | 10 (12.4%)          |
|                      | Comprehensive Community Cancer Program | 49 (53.9%)             | 33 (40.7%)          |
|                      | Academic/Research Program              | 13 (14.3%)             | 23 (28.4%)          |
|                      | Integrated Network Cancer Program      | 15 (16.5%)             | 15 (18.5%)          |

### Contralateral prophylactic mastectomy (CPM) for patients with unilateral breast cancer

|                      | Facility Category                      | Bottom Quintile | Top Quintile |
|----------------------|----------------------------------------|-----------------|--------------|
| Breast Cancer Volume | Low Volume                             | 39 (48.8%)      | 46 (50.0%)   |
|                      | Medium Volume                          | 25 (31.3%)      | 23 (25.0%)   |
|                      | High Volume                            | 16 (20.0%)      | 23 (25.0%)   |
| Facility Type        | Community Cancer Program*              | 17 (21.3%)*     | 2 (2.2%)*    |
|                      | Comprehensive Community Cancer Program | 36 (45.0%)      | 46 (50.0%)   |
|                      | Academic/Research Program              | 18 (22.5%)      | 23 (25.0%)   |
|                      | Integrated Network Cancer Program*     | 9 (11.3%)*      | 21 (22.8%)*  |

### Sentinel lymph node biopsy (SLNB) for women $\geq 70$ years old with clinically node negative hormone receptor positive cancer

|                      | Facility Category                        | Bottom Quintile | Top Quintile |
|----------------------|------------------------------------------|-----------------|--------------|
| Breast Cancer Volume | Low Volume                               | 39 (48.2%)      | 40 (52.0%)   |
|                      | Medium Volume                            | 27 (33.3%)      | 21 (27.3%)   |
|                      | High Volume                              | 15 (18.5%)      | 16 (20.8%)   |
| Facility Type        | Community Cancer Program                 | 10 (12.4%)      | 13 (16.9%)   |
|                      | Comprehensive Community Cancer Program** | 25 (30.9%)**    | 37 (48.1%)** |
|                      | Academic/Research Program**              | 30 (37.0%)**    | 16 (20.8%)** |
|                      | Integrated Network Cancer Program        | 16 (19.8%)      | 11 (14.3%)   |

\*p<.001, \*\*p=.050

**Appendix D. Trends in performance of low-value breast cancer operations based on facility type**

**Axillary lymph node dissection (ALND) for lumpectomy patients with 1-2 positive nodes receiving radiotherapy**

| Facility Type                          | % 2004 | % 2010 | % 2011 | % 2016 | % Relative Reduction (2004-2016) | Δ 2004-2010 | Δ 2010-2011 | Δ 2011-2016 |
|----------------------------------------|--------|--------|--------|--------|----------------------------------|-------------|-------------|-------------|
| Community Cancer Program               | 42.0   | 45.7   | 28.3   | 17.9   | 57.4                             | 3.6         | -17.3       | -10.4       |
| Comprehensive Community Cancer Program | 60.0   | 59.0   | 27.1   | 14.3   | 76.2                             | -1.0        | -31.9***    | -12.8***    |
| Academic Research Program              | 68.3   | 64.8   | 37.4   | 14.5   | 78.8                             | -3.5**      | -27.4***    | -22.9***    |
| Integrated Network Cancer Program      | 62.6   | 66.2   | 29.1   | 13.4   | 78.6                             | 3.6         | -37.1***    | -15.7***    |

**Lumpectomy re-operation for patients receiving radiotherapy**

| Facility Type                          | % 2004 | % 2013 | % 2014 | % 2016 | % Relative Reduction (2004-2016) | Δ 2004-2013 | Δ 2013-2014 | Δ 2014-2016 |
|----------------------------------------|--------|--------|--------|--------|----------------------------------|-------------|-------------|-------------|
| Community Cancer Program               | 19.2   | 19.1   | 15.5   | 15.4   | 19.8                             | 0.0         | -3.6***     | -0.1        |
| Comprehensive Community Cancer Program | 20.4   | 19.4   | 16.6   | 15.7   | 23.0                             | -1.0***     | -2.7***     | -0.9***     |
| Academic Research Program              | 21.9   | 19.1   | 16.7   | 15.4   | 29.7                             | -2.8***     | -2.4**      | -1.2***     |
| Integrated Network Cancer Program      | 20.2   | 19.2   | 16.7   | 15.9   | 21.3                             | -1.0***     | -2.6**      | -0.8***     |

### Contralateral prophylactic mastectomy (CPM) for patients with unilateral breast cancer

| Facility Type                          | % 2004 | % 2006 | % 2007 | % 2016 | Δ 2004-2006 | Δ 2006-2007 | Δ 2007-2016 |
|----------------------------------------|--------|--------|--------|--------|-------------|-------------|-------------|
| Community Cancer Program               | 7.9    | 10.9   | 12.9   | 27.6   | 3.0         | 2.0         | 14.7***     |
| Comprehensive Community Cancer Program | 10.9   | 13.4   | 18.9   | 27.5   | 2.5***      | 5.5***      | 8.6***      |
| Academic Research Program              | 12.1   | 12.5   | 14.7   | 25.8   | 0.4         | 2.3***      | 11.1***     |
| Integrated Network Cancer Program      | 12.6   | 16.4   | 17.6   | 32.0   | 3.7*        | 1.2*        | 14.4***     |

### Sentinel lymph node biopsy (SLNB) for women ≥70 years old with clinically node negative hormone receptor positive cancer

| Facility Type                          | % 2004 | % 2012 | % 2013 | % 2016 | Δ 2004-2012 | Δ 2012-2013 | Δ 2013-2016 |
|----------------------------------------|--------|--------|--------|--------|-------------|-------------|-------------|
| Community Cancer Program               | 73.5   | 86.8   | 88.9   | 87.9   | 13.2***     | 2.1         | -0.9        |
| Comprehensive Community Cancer Program | 79.0   | 87.0   | 87.1   | 87.4   | 8.0***      | 0.1         | 0.3         |
| Academic Research Program              | 75.3   | 85.9   | 85.3   | 84.2   | 10.6***     | -0.6        | -1.1        |
| Integrated Network Cancer Program      | 74.8   | 87.7   | 88.1   | 87.4   | 12.9***     | 0.4         | -0.8        |

\*p<.05, \*\*p<.01, \*\*\*p<.001



**Appendix E. Trends in performance of low-value breast cancer operations based on facility volume**

**Axillary lymph node dissection (ALND) for lumpectomy patients with 1-2 positive nodes receiving radiotherapy**

|               | % 2004 | % 2010 | % 2011 | % 2016 | % Relative reduction (2004-2016) | Δ 2004-2010 | Δ 2010-2011 | Δ 2011-2016 |
|---------------|--------|--------|--------|--------|----------------------------------|-------------|-------------|-------------|
| Low Volume    | 60.5   | 65.6   | 28.3   | 13.6   | 77.5                             | 5.2         | -37.3***    | -14.7***    |
| Medium Volume | 62.1   | 63.8   | 42.8   | 17.3   | 72.3                             | 1.7         | -21.0***    | -25.4***    |
| High Volume   | 65.2   | 62.1   | 24.0   | 13.5   | 79.3                             | -3.1**      | -38.1***    | -10.5***    |

**Lumpectomy re-operation for patients receiving radiotherapy**

|               | % 2004 | % 2013 | % 2014 | % 2016 | % Relative reduction (2004-2016) | Δ 2004-2013 | Δ 2013-2014 | Δ 2014-2016 |
|---------------|--------|--------|--------|--------|----------------------------------|-------------|-------------|-------------|
| Low Volume    | 19.1   | 17.6   | 14.9   | 15.1   | 20.9                             | -1.5**      | -2.7***     | 0.1         |
| Medium Volume | 19.4   | 18.0   | 15.8   | 15.3   | 21.1                             | -1.4***     | -2.2***     | -0.5        |
| High Volume   | 22.1   | 20.6   | 17.6   | 16.0   | 27.6                             | -1.5        | -2.9*       | -1.7        |

### Contralateral prophylactic mastectomy (CPM) for patients with unilateral breast cancer

|               | % 2004 | % 2006 | % 2007 | % 2016 | Δ 2004-2006 | Δ 2006-2007 | Δ 2007-2016 |
|---------------|--------|--------|--------|--------|-------------|-------------|-------------|
| Low Volume    | 7.3    | 9.0    | 12.6   | 23.6   | 1.7         | 3.5*        | 11.0***     |
| Medium Volume | 9.5    | 12.1   | 15.0   | 26.5   | 2.6***      | 3.0***      | 11.5***     |
| High Volume   | 13.7   | 15.0   | 18.1   | 29.2   | 1.3*        | 3.1***      | 11.1***     |

### Sentinel lymph node biopsy (SLNB) for women ≥70 years old with clinically node negative hormone receptor positive cancer

|               | % 2004 | % 2012 | % 2013 | % 2016 | Δ 2004-2012 | Δ 2012-2013 | Δ 2013-2016 |
|---------------|--------|--------|--------|--------|-------------|-------------|-------------|
| Low Volume    | 79.4   | 86.5   | 87.2   | 88.1   | 7.1***      | 0.7         | 0.9         |
| Medium Volume | 77.3   | 86.8   | 87.6   | 86.6   | 9.4***      | 0.8         | -1.1*       |
| High Volume   | 77.2   | 87.3   | 86.5   | 86.1   | 10.1***     | -0.8        | -0.4        |

\*p<.05, \*\*p<.01, \*\*\*p<.001
